# Supplementary material for: Directed assembly of a high surface area 2D metal–organic framework displaying the augmented “kagomé dual” (kgd-a) layered topology with high H2and CO2uptake
Source: Royal Society of Chemistry journal article supplement (doi:10.1039/c6qi00547k), 2017-01-01
Supplement: c6qi00547k1.pdf [file c6qi00547k1.pdf]

## ELECTROCTRONIC SUPPLEMENTARY INFORMATION (ESI)

### **Directed assembly of a high surface area 2D metal-organic framework displaying the augmented “kagomé dual” (kgd-a) layered topology with high H<sub>2</sub> and CO<sub>2</sub> uptake**

Ioannis Spanopoulos,<sup>a</sup> Constantinos Tsangarakis,<sup>a</sup> Sarah Barnett,<sup>b</sup>  
Harriot Nowell,<sup>b</sup> Emmanuel Klontzas,<sup>a</sup> George E. Froudakis<sup>a</sup> and  
Pantelis N. Trikalitis<sup>a,\*</sup>

<sup>a</sup> *Department of Chemistry, University of Crete, Voutes 71003 Heraklion, Greece*

<sup>b</sup> *Diamond Light Source, Harwell Science and Innovation Campus, Didcot, Oxfordshire OX11 0DE, UK*

#### **Table of Contents**

|                                               |         |
|-----------------------------------------------|---------|
| Optical images of <b>1</b>                    | S1      |
| Energy Dispersive Spectroscopy Analysis (EDS) | S1-S2   |
| Single crystal data                           | S4-S7   |
| Powder X-ray diffraction studies              | S7      |
| Additional gas sorption data and analyses     | S8-S14  |
| NMR Spectra of acid digested samples          | S15-S16 |
| Thermal gravimetric analyses (TGA)            | S17     |
| Quantum chemistry calculations                | S19     |
| References                                    | S23     |

## Optical images of **1**

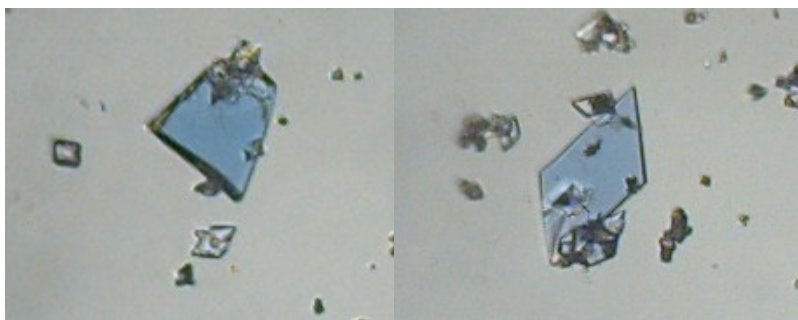

**Figure S1.** Optical microscope pictures of single crystals of **1**.

## Energy Dispersive Spectroscopy Analysis (EDS)

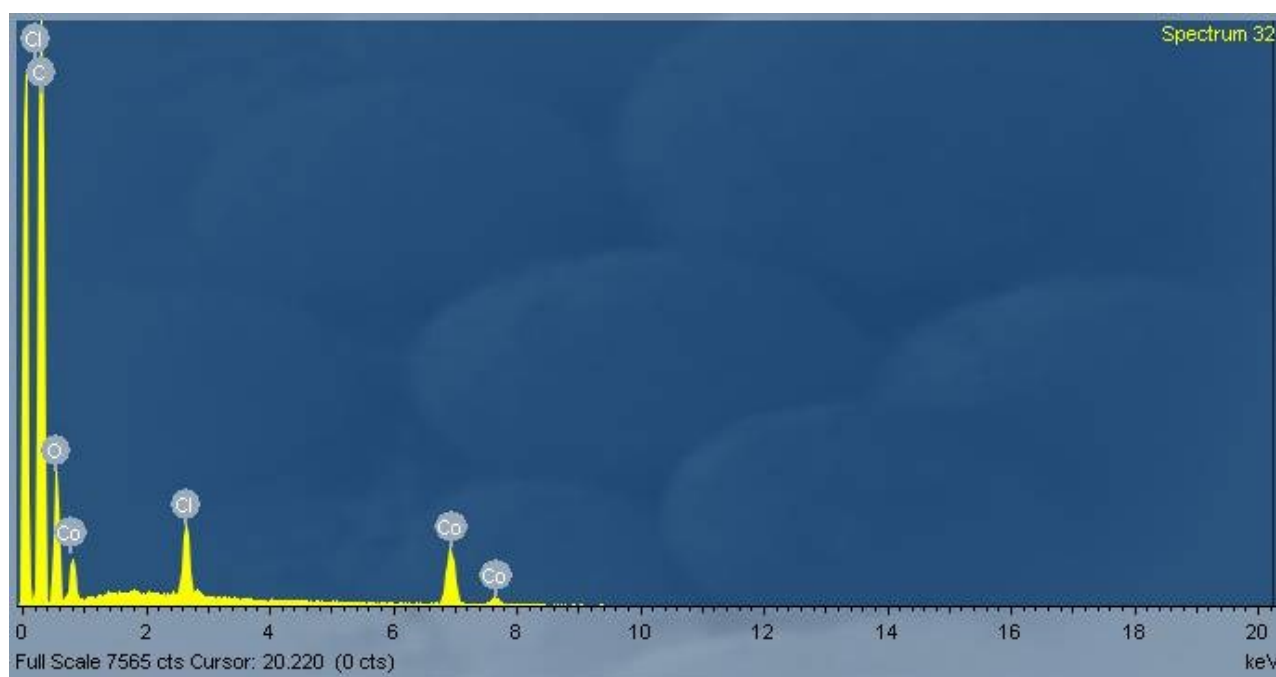

**Figure S2.** EDS spectrum of **1** obtained in an scanning electron microscope.

**Table S1.** EDS quantitative analysis of **1** on different single crystals.

Crystal #1:

| Element | App   | Intensity | Weight% | Weight% | Atomic%     |
|---------|-------|-----------|---------|---------|-------------|
|         | Conc. | Corrn.    |         | Sigma   |             |
| Cl K    | 13.90 | 0.8312    | 1.78    | 0.06    | <b>0.68</b> |
| Co K    | 43.06 | 0.7668    | 5.98    | 0.15    | <b>1.38</b> |

Crystal #2:

| Element | App   | Intensity | Weight% | Weight% | <b>Atomic%</b> |
|---------|-------|-----------|---------|---------|----------------|
|         | Conc. | Corrn.    |         | Sigma   |                |
| Cl K    | 14.78 | 0.8312    | 1.87    | 0.06    | <b>0.72</b>    |
| Co K    | 46.01 | 0.7675    | 6.30    | 0.18    | <b>1.46</b>    |

Crystal #3:

| Element | App   | Intensity | Weight% | Weight% | <b>Atomic%</b> |
|---------|-------|-----------|---------|---------|----------------|
|         | Conc. | Corrn.    |         | Sigma   |                |
| Cl K    | 14.33 | 0.8313    | 1.83    | 0.06    | <b>0.70</b>    |
| Co K    | 43.48 | 0.7669    | 6.03    | 0.15    | <b>1.39</b>    |

## Single crystal data

**Table S2.** Crystal data and structure refinement for **1** at 250(2) K.

|                                   |                                                                                        |
|-----------------------------------|----------------------------------------------------------------------------------------|
| Empirical formula                 | C <sub>84</sub> H <sub>48</sub> Cl <sub>2</sub> Co <sub>4</sub> O <sub>18</sub>        |
| Formula weight                    | 1651.84                                                                                |
| Temperature                       | 250(2) K                                                                               |
| Wavelength                        | 0.6889 Å                                                                               |
| Crystal system                    | Monoclinic                                                                             |
| Space group                       | C2/m                                                                                   |
| Unit cell dimensions              | a = 30.84(3) Å, α = 90°<br>b = 23.83(2) Å, β = 101.531(13)°<br>c = 21.31(2) Å, γ = 90° |
| Volume                            | 15347(24) Å <sup>3</sup>                                                               |
| Z                                 | 4                                                                                      |
| Density (calculated)              | 0.715 g/cm <sup>3</sup>                                                                |
| Absorption coefficient            | 0.495 mm <sup>-1</sup>                                                                 |
| F(000)                            | 3352                                                                                   |
| Crystal size                      | 0.300 x 0.200 x 0.050 mm <sup>3</sup>                                                  |
| Theta range for data collection   | 1.326 to 26.018°                                                                       |
| Index ranges                      | -38 ≤ h ≤ 38, -30 ≤ k ≤ 30, -26 ≤ l ≤ 27                                               |
| Reflections collected             | 114185                                                                                 |
| Independent reflections           | 16726 [R <sub>int</sub> = 0.0810]                                                      |
| Completeness to θ = 24.415°       | 100%                                                                                   |
| Refinement method                 | Full-matrix least-squares on F <sup>2</sup>                                            |
| Data / restraints / parameters    | 16726 / 24 / 547                                                                       |
| Goodness-of-fit on F <sup>2</sup> | 1.520                                                                                  |
| Final R indices [I > 2σ(I)]       | R <sub>obs</sub> = 0.1091, wR <sub>obs</sub> = 0.2860                                  |
| R indices (all data)              | R <sub>all</sub> = 0.1511, wR <sub>all</sub> = 0.3063                                  |
| Largest diff. peak and hole       | 0.932 and -0.846 e.Å <sup>-3</sup>                                                     |

$R = \sum |F_o| - |F_c| / \sum |F_o|$ ,  $wR = \{\sum [w(|F_o|^2 - |F_c|^2)^2] / \sum [w(|F_o|^4)]\}^{1/2}$  and  
 $w = 1/[\sigma^2(F_o^2) + (0.1000P)^2]$  where  $P = (F_o^2 + 2F_c^2)/3$

**Table S3.** Selected bond lengths [Å] for **1** at 250(2) K with estimated standard deviations in parentheses.

| Label         | Distances |
|---------------|-----------|
| Co(1)-O(1)    | 2.042(3)  |
| Co(1)-O(1)#1  | 2.042(3)  |
| Co(1)-O(4)#2  | 2.090(5)  |
| Co(1)-O(9)    | 2.099(6)  |
| Co(1)-O(10)#1 | 2.145(4)  |
| Co(1)-O(10)   | 2.145(4)  |
| Co(2)-O(2)#1  | 1.944(4)  |
| Co(2)-O(2)    | 1.944(4)  |
| Co(2)-O(3)#2  | 2.025(4)  |
| Co(2)-Cl(2)   | 2.236(3)  |
| Co(2)-O(4)#2  | 2.391(5)  |
| Co(3)-O(5)    | 1.915(4)  |
| Co(3)-O(5)#1  | 1.915(4)  |
| Co(3)-O(8)#3  | 1.935(5)  |
| Co(3)-Cl(1)   | 2.225(3)  |
| Co(4)-O(6)    | 2.002(5)  |
| Co(4)-O(6)#1  | 2.002(5)  |
| Co(4)-O(7)#3  | 2.020(7)  |
| Co(4)-O(12)   | 2.082(8)  |
| Co(4)-O(11)#1 | 2.172(7)  |
| Co(4)-O(11)   | 2.172(7)  |

Symmetry transformations used to generate equivalent atoms:

1# x,-y+1,z 2# -x-1/2,-y+1/2,-z+2 3# -x-1/2,-y+1/2,-z+1

**Table S4.** Crystal data and structure refinement for **2** at 120(2) K.

|                                         |                                                                                                                                   |
|-----------------------------------------|-----------------------------------------------------------------------------------------------------------------------------------|
| Empirical formula                       | C84 H44 Co2 O14                                                                                                                   |
| Formula weight                          | 1395.05                                                                                                                           |
| Temperature                             | 120(2) K                                                                                                                          |
| Wavelength                              | 0.86380 Å                                                                                                                         |
| Crystal system                          | Monoclinic                                                                                                                        |
| Space group                             | C2/m                                                                                                                              |
| Unit cell dimensions                    | $a = 41.909(13)$ Å, $\alpha = 90^\circ$<br>$b = 24.156(7)$ Å, $\beta = 95.829(5)^\circ$<br>$c = 11.898(4)$ Å, $\gamma = 90^\circ$ |
| Volume                                  | $11982(6)$ Å <sup>3</sup>                                                                                                         |
| Z                                       | 4                                                                                                                                 |
| Density (calculated)                    | $0.773$ g/cm <sup>3</sup>                                                                                                         |
| Absorption coefficient                  | $0.316$ mm <sup>-1</sup>                                                                                                          |
| F(000)                                  | 2856                                                                                                                              |
| Crystal size                            | $0.400 \times 0.200 \times 0.200$ mm <sup>3</sup>                                                                                 |
| Theta range for data collection         | $0.974$ to $25.541^\circ$                                                                                                         |
| Index ranges                            | $-48 \leq h \leq 50$ , $-28 \leq k \leq 28$ , $-12 \leq l \leq 9$                                                                 |
| Reflections collected                   | 38635                                                                                                                             |
| Independent reflections                 | 9917 [ $R_{\text{int}} = 0.0408$ ]                                                                                                |
| Completeness to $\theta = 25.242^\circ$ | 91%                                                                                                                               |
| Refinement method                       | Full-matrix least-squares on $F^2$                                                                                                |
| Data / restraints / parameters          | 9917 / 0 / 451                                                                                                                    |
| Goodness-of-fit on $F^2$                | 1.201                                                                                                                             |
| Final R indices [ $I > 2\sigma(I)$ ]    | $R_{\text{obs}} = 0.0680$ , $wR_{\text{obs}} = 0.1899$                                                                            |
| R indices (all data)                    | $R_{\text{all}} = 0.0834$ , $wR_{\text{all}} = 0.2010$                                                                            |
| Largest diff. peak and hole             | $0.574$ and $-0.557$ e.Å <sup>-3</sup>                                                                                            |

$R = \sum ||F_o| - |F_c|| / \sum |F_o|$ ,  $wR = \{\sum [w(|F_o|^2 - |F_c|^2)^2] / \sum [w(|F_o|^4)]\}^{1/2}$  and  $w = 1/[\sigma^2(F_o^2) + (0.1000P)^2]$  where  $P = (F_o^2 + 2F_c^2)/3$

**Table S5.** Selected bond lengths [Å] for **2** at 120(2) K with estimated standard deviations in parentheses.

| Label      | Distances |
|------------|-----------|
| Co(1)-O(5) | 2.000(2)  |
| Co(1)-O(1) | 2.047(3)  |
| Co(1)-O(6) | 2.062(2)  |
| Co(1)-O(3) | 2.073(2)  |
| Co(1)-O(2) | 2.326(2)  |
| Co(1)-O(7) | 2.393(3)  |

### Powder X-ray diffraction

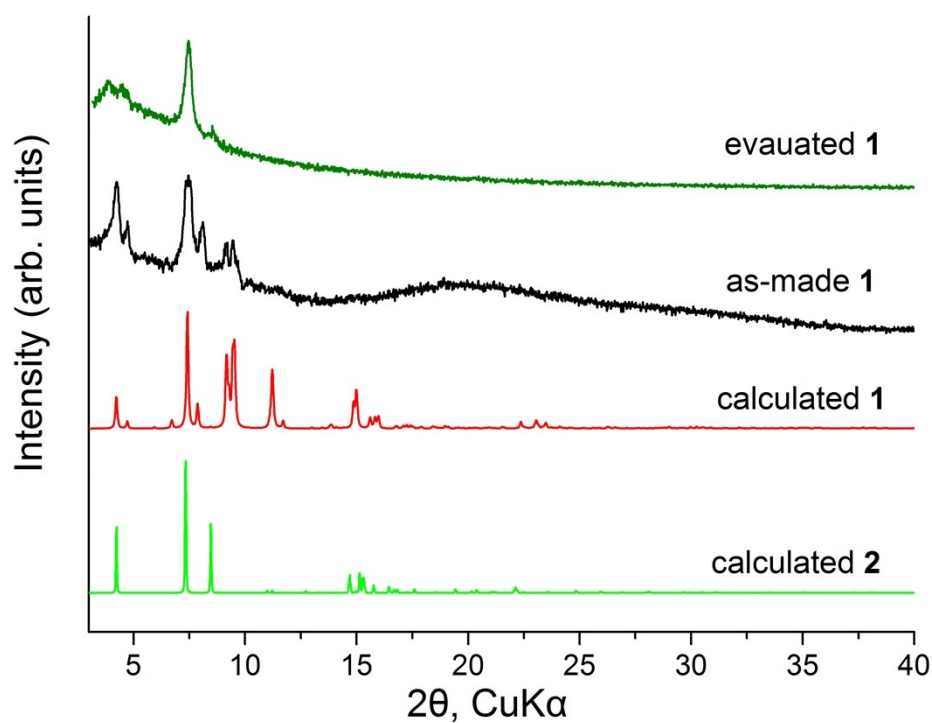

**Figure S3.** Powder X-ray diffraction pattern of calculated **1** and **2**, as made **1** and evacuated **1**.

## Additional gas sorption data and analyses

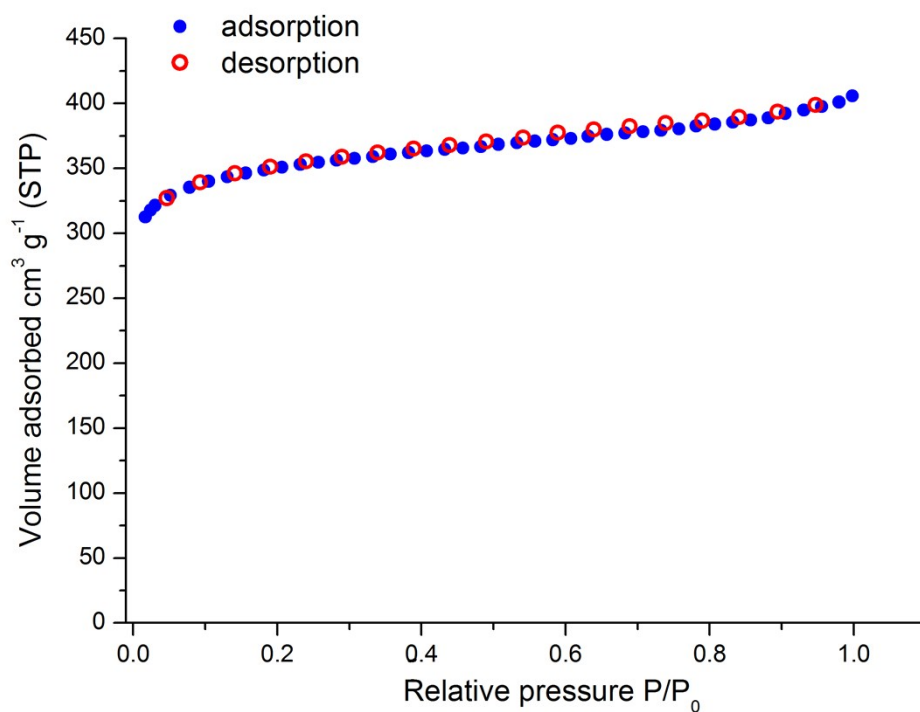

**Figure S4.** Nitrogen adsorption isotherm of **1** recorded at 77 K.

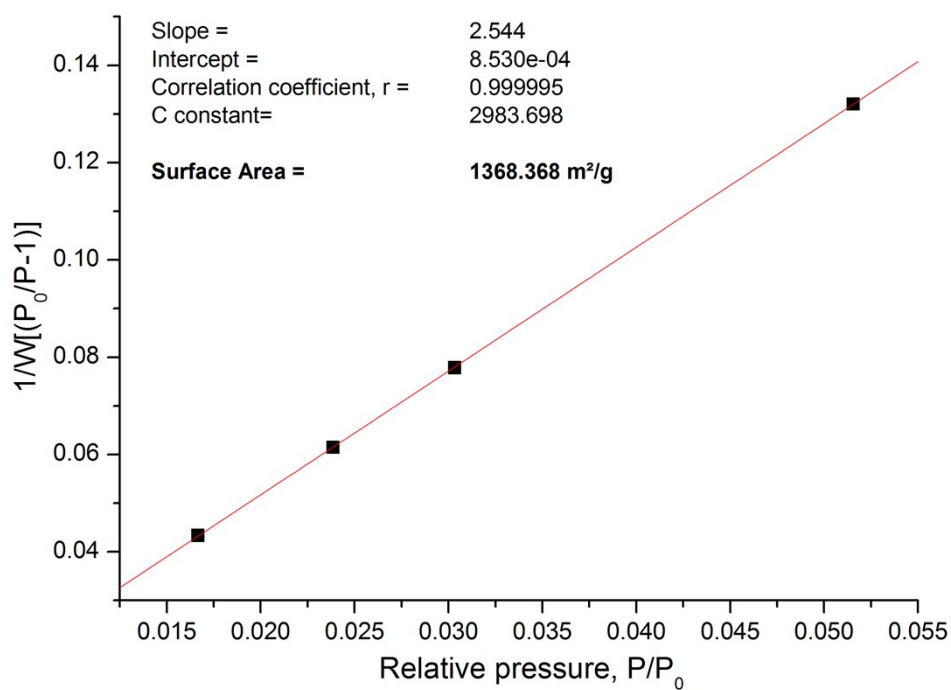

**Figure S5.** BET plot for **1** from  $\text{N}_2$  adsorption isotherm.



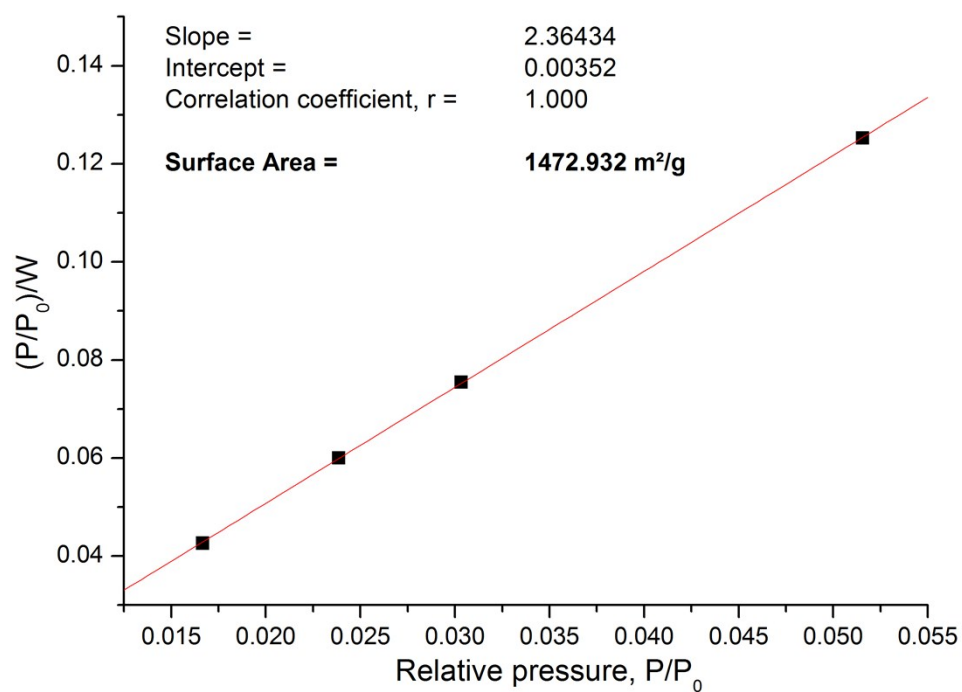

**Figure S6.** Langmuir plot for **1** from N<sub>2</sub> adsorption isotherm.

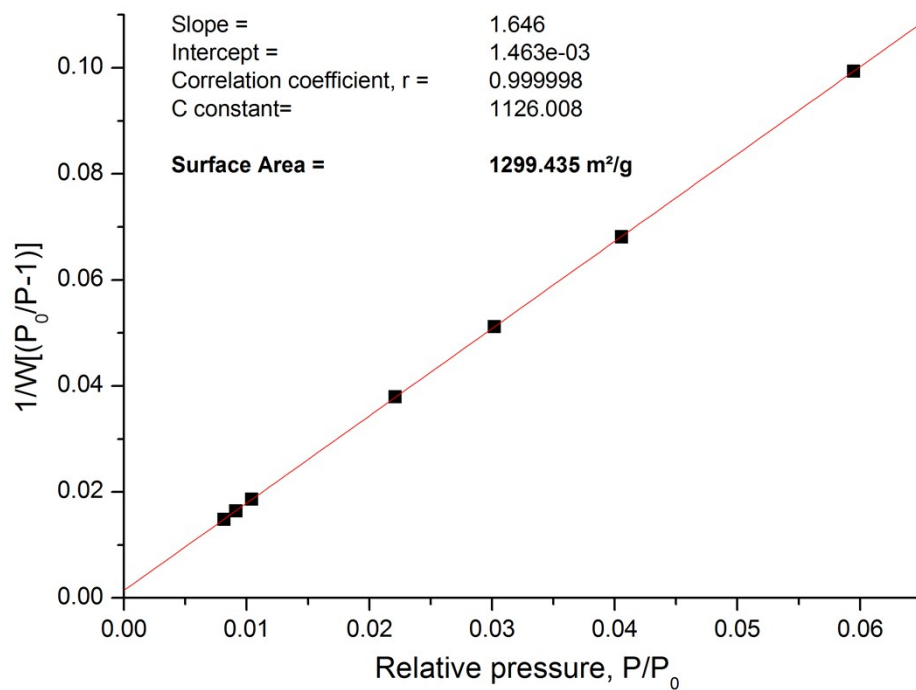

**Figure S7.** BET plot for **1** from Ar adsorption isotherm.

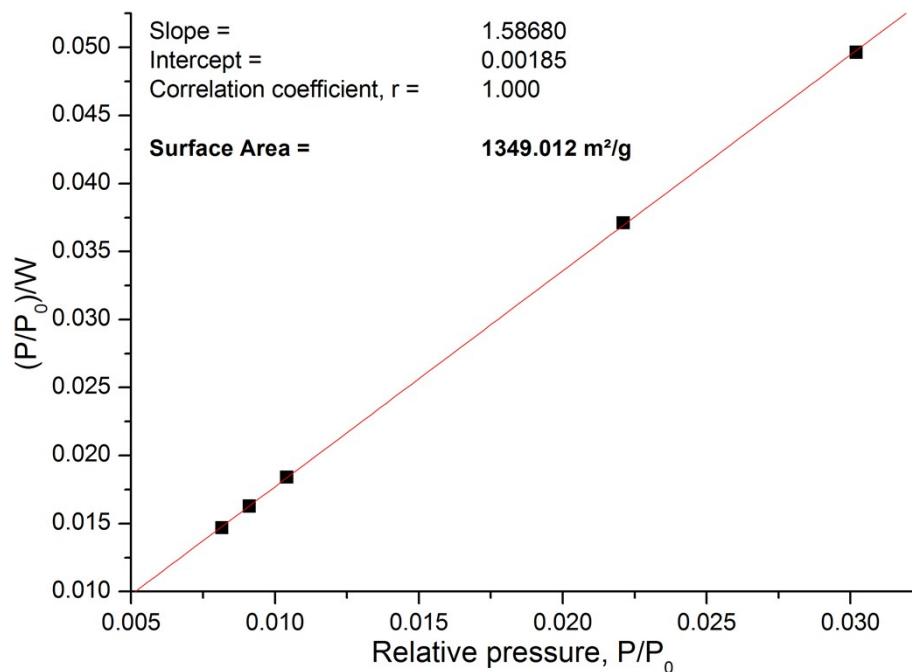

**Figure S8.** Langmuir plot for **1** from Ar adsorption isotherm.

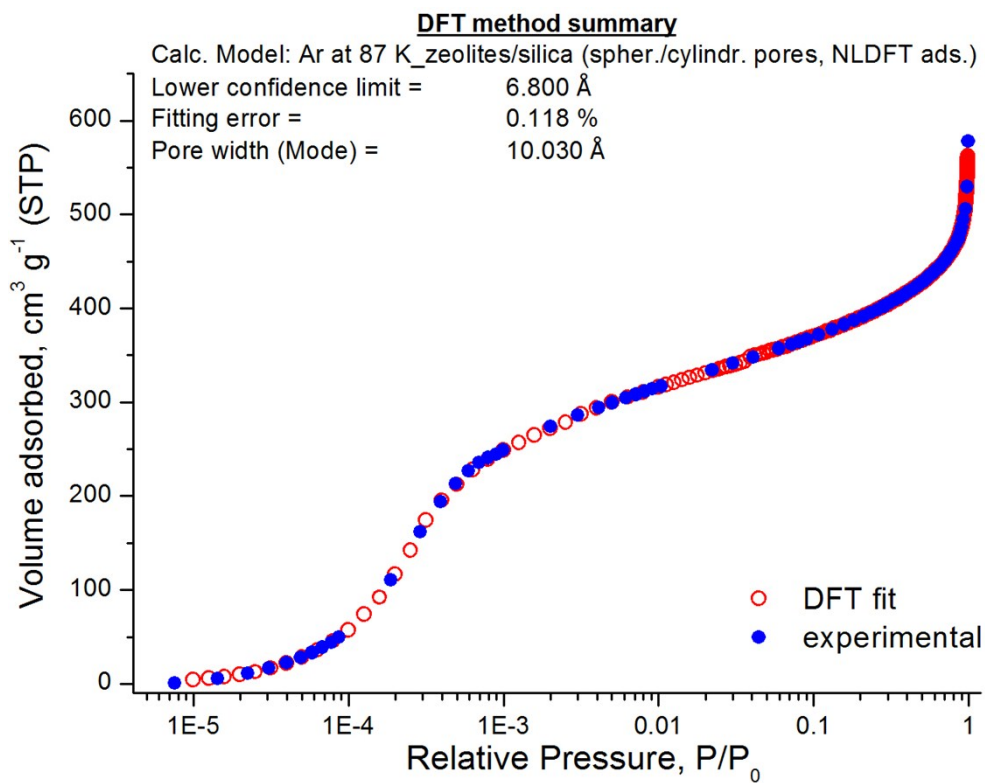

**Figure S9.** Argon adsorption isotherm of **1** at 87 K in logarithmic scale and the corresponding NLDFT fitting.

## Low pressure CO<sub>2</sub>, CH<sub>4</sub>, and H<sub>2</sub> sorption isotherms, determination of heat of adsorption and CO<sub>2</sub>/CH<sub>4</sub> selectivity calculations using IAST.

**Heat of adsorption.** For the determination of the isosteric heat of adsorption using the Clausius-Clapeyron equation, a commercially available software, ASiQwin (version 3.01) purchased from Quantachrome, was used.

**Gas selectivity using IAST.** The corresponding calculations were performed according to an established procedure.<sup>1</sup> Specifically, the single-component adsorption isotherms were described by fitting the data with the following virial-type equation:

$$p = \frac{n}{K} \exp\left(c_1 n + c_2 n^2 + c_3 n^3 + c_4 n^4\right) \quad (1)$$

where  $p$  is the pressure in Torr,  $n$  is the adsorbed amount in mmol g<sup>-1</sup>,  $K$  is the Henry constant in mmol g<sup>-1</sup> Torr<sup>-1</sup> and  $c_i$  are the constants of the virial equation.

The free energy of desorption at a given temperature and pressure of the gas is obtained from the analytical integration of eq. (1):

$$G(T,p) = RT \int_0^p \frac{n}{p} dp = RT \left( n + \frac{1}{2} c_1 n^2 + \frac{2}{3} c_2 n^3 + \frac{3}{4} c_3 n^4 + \frac{4}{5} c_4 n^5 \right) \quad (2)$$

The free energy of desorption is a function of temperature and pressure  $G(T,p)$  and describes the minimum work (Gibbs free energy) that required to completely degas the adsorbent surface.

For a binary mixture of component  $i$  and  $j$  eq. (2) yields the individual pure loadings  $n_i^0$  and  $n_j^0$  at the same free energy of desorption:

$$G_i^0(n_i^0) = G_j^0(n_j^0) \quad (3)$$

The partial pressure of component  $i$  and  $j$  in an ideal adsorption mixture is given by the following equations:

$$py_i = p_i^0(n_i^0)x_i \quad (4)$$

$$py_j = p_j^0(n_j^0)x_j \quad (5)$$

where  $y_i$  ( $=1-y_j$ ) and  $x_i$  ( $=1-x_j$ ) is the molar fraction of component  $i$  in the gas phase and the adsorbed phase respectively and  $p_i^0, p_j^0$  is the pure component pressure of  $i$  and  $j$  respectively. From eq. (3)-(5), the selectivity for the adsorbates  $i$  and  $j$  ( $S_{i,j}$ ) and the total pressure ( $p$ ) of the gas mixture were calculated from eq. (6) and eq. (7), respectively.

$$S_{ij} = \frac{x_i/y_i}{x_j/y_j} = \frac{p_j^0}{p_i^0} \quad (6)$$

$$p = \sum_i^j (p_i^0 x_i) \quad (7)$$

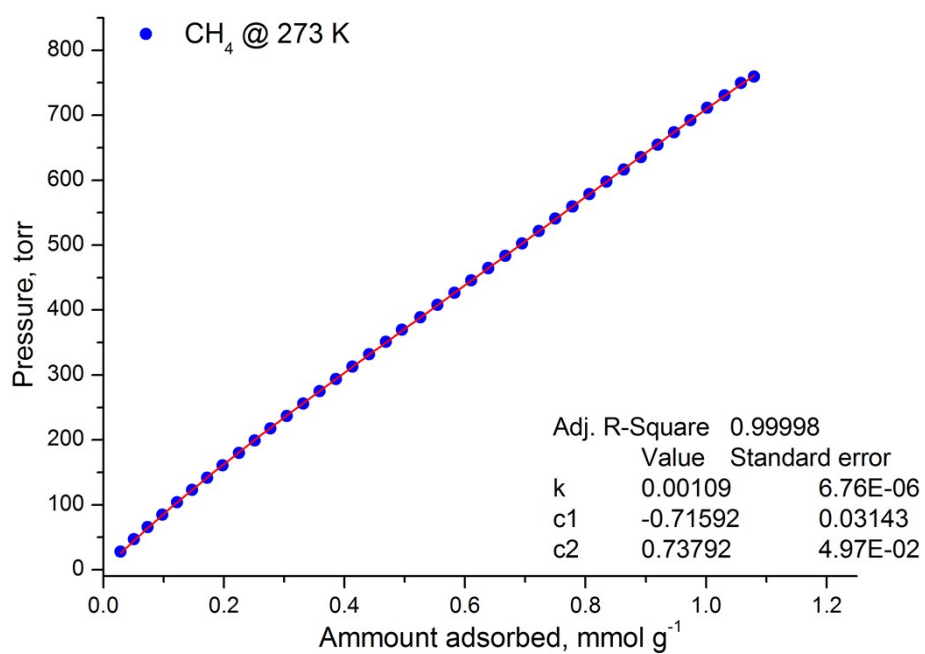

**Figure S10.** Virial type fitting of CH<sub>4</sub> adsorption isotherms of **1** at 273 K according to equation 1, for IAST calculations.

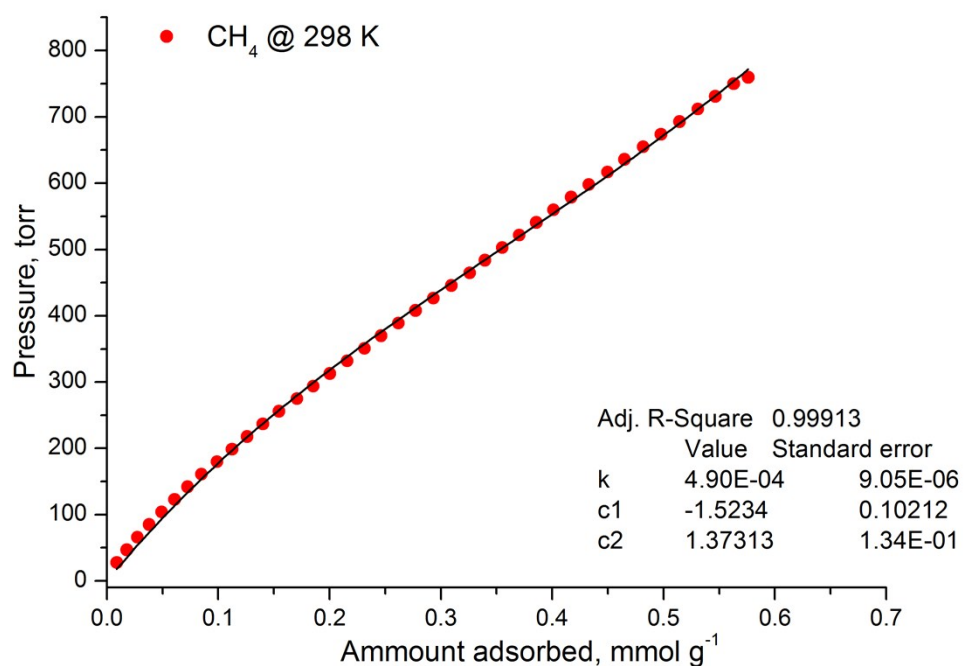

**Figure S11.** Virial type fitting of CH<sub>4</sub> adsorption isotherms of **1** at 298 K according to equation 1, for IAST calculations

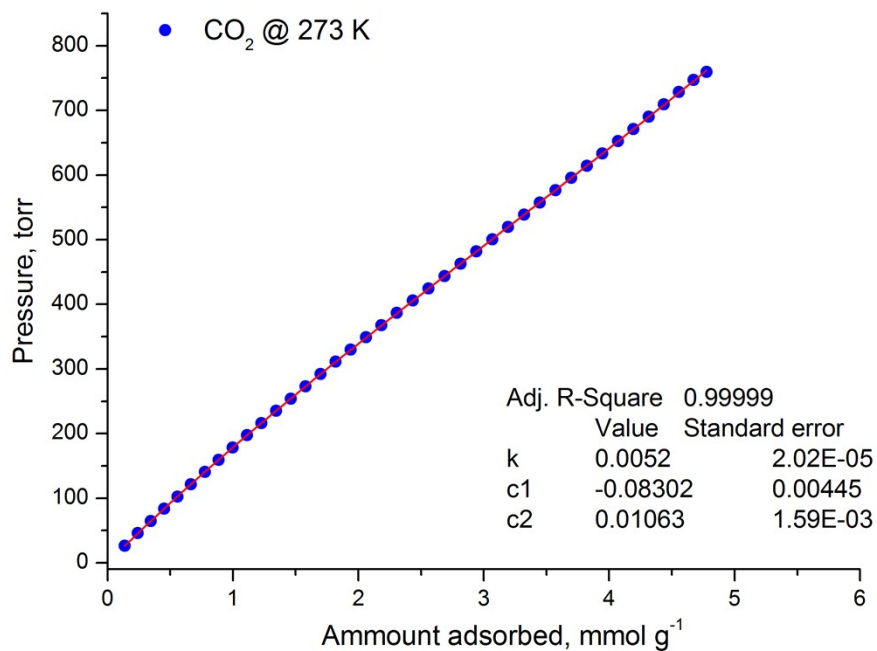

**Figure S12.** Virial type fitting of CO<sub>2</sub> adsorption isotherms of **1** at 273 K according to equation 1, for IAST calculations.

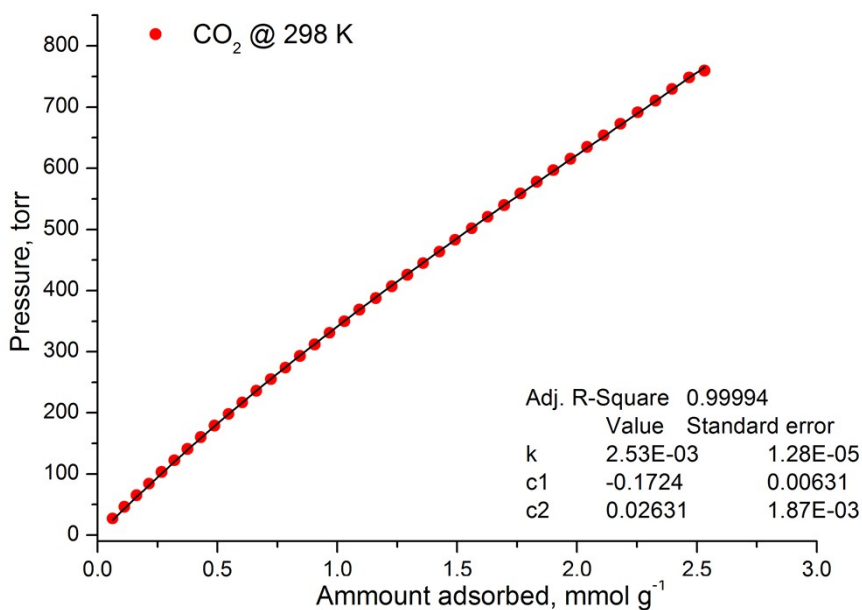

**Figure S13.** Virial type fitting of CO<sub>2</sub> adsorption isotherms of **1** at 298 K according to equation 1, for IAST calculations.

## $^1\text{H}$ NMR Spectra of acid digested samples

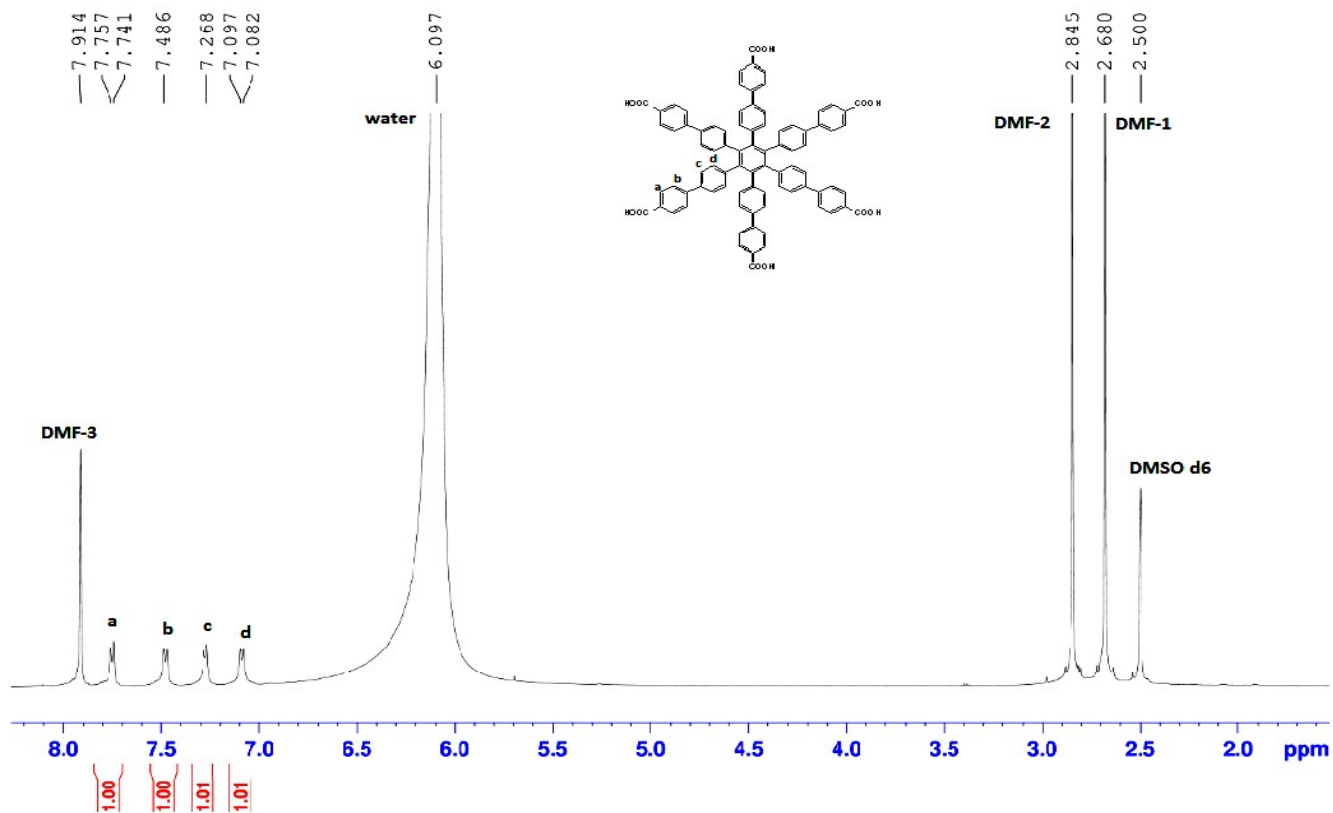

**Figure S14.**  $^1\text{H}$  NMR spectrum of as-made **1** after digesting the sample in HCl/DMSO- $d_6$  solution.

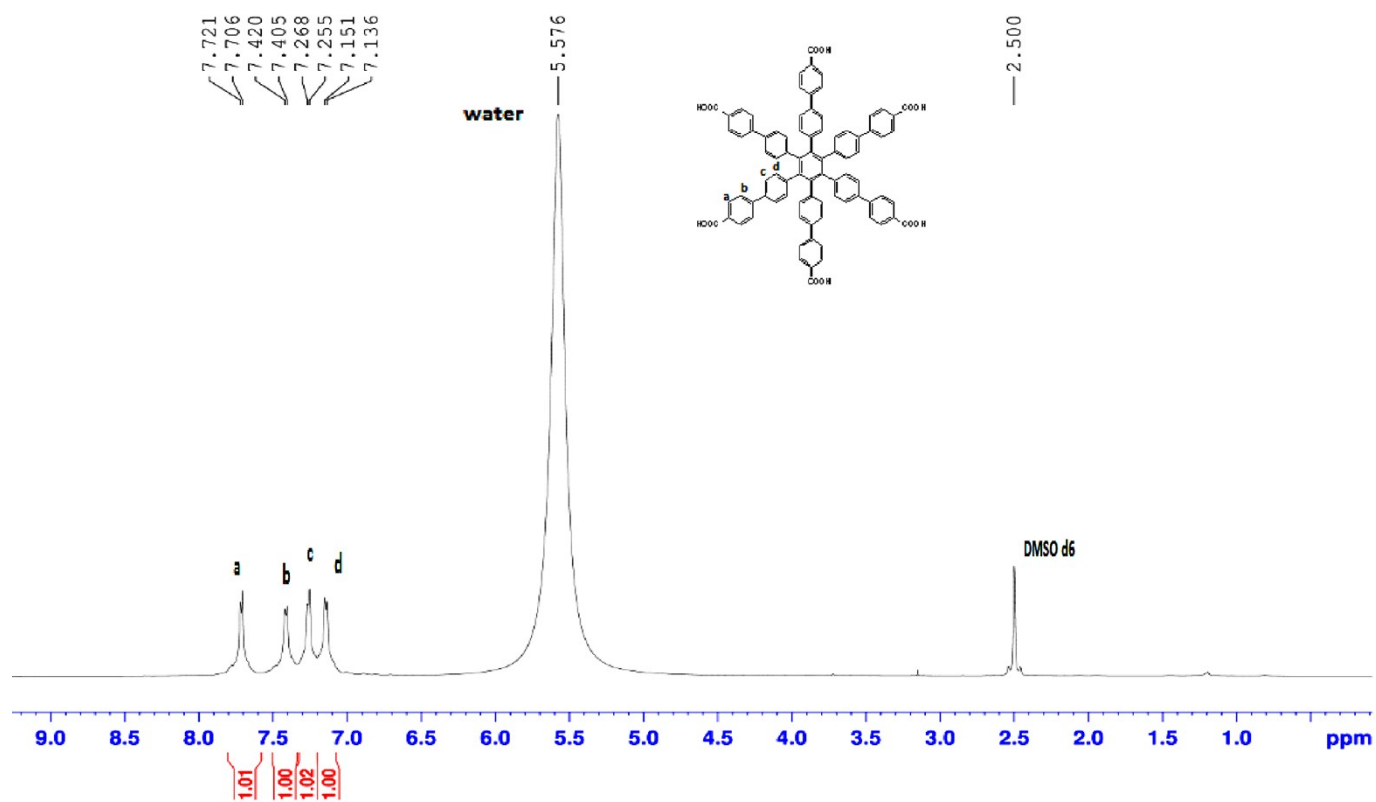

**Figure S15.** <sup>1</sup>H NMR spectrum of **1** after CO<sub>2</sub> supercritical drying and digesting the sample in HCl/DMSO-*d*<sub>6</sub> solution. No residual solvents were observed.



## Thermal gravimetric analyses (TGA)

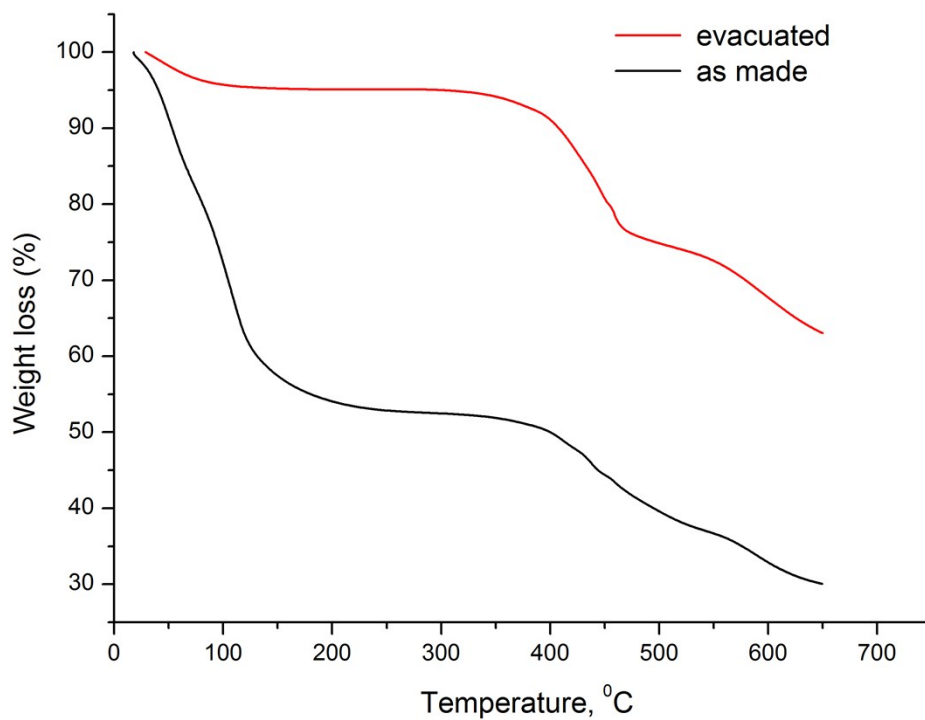

**Figure S16.** TGA curve for the as-made **1** (black line) and the corresponding evacuated solid (red line) obtained after CO<sub>2</sub> SCD process, recorded under N<sub>2</sub> flow with a heating rate of 5 deg/min.

**Table S6.** Comparison of **1** with selected MOFs in terms of BET surface area and CH<sub>4</sub> isosteric heat of adsorption.

| <b>Compound</b>              | <b>BET area<br/>m<sup>2</sup> g<sup>-1</sup></b> | <b><math>Q_{st}^0</math><br/>kJ mol<sup>-1</sup></b> |
|------------------------------|--------------------------------------------------|------------------------------------------------------|
| <b>1</b>                     | 1299                                             | 18.2                                                 |
| <b>Cu-INIP<sup>2</sup></b>   | 1785                                             | 21.2                                                 |
| <b>MAF-38<sup>3</sup></b>    | 2022                                             | 21.6                                                 |
| <b>Ni-MOF-74<sup>4</sup></b> | 1350                                             | 21.4                                                 |
| <b>HKUST-1<sup>6</sup></b>   | 1850                                             | 17                                                   |
| <b>PCN-14<sup>6</sup></b>    | 2000                                             | 18.7                                                 |
| <b>UTSA-76<sup>5</sup></b>   | 2820                                             | 15.4                                                 |
| <b>NU-111<sup>6</sup></b>    | 4930                                             | 14.2                                                 |
| <b>NU-1100<sup>7</sup></b>   | 4020                                             | 13.7                                                 |

### Quantum chemistry calculations

Quantum chemistry calculations were performed in order to get further insight into the interaction of  $\text{CO}_2$  and  $\text{CH}_4$  with the structure of **1**. Two molecular models were constructed to represent the adsorption sites in **1** as shown in Figure S17. The first model is composed by a central phenyl ring together with six biphenyl arms. The second model contains the inorganic building block,  $\text{Co}_2\text{Cl}(\text{-COO})_3$ , with the corresponding biphenyl arms and the octahedral  $\text{Co}^{2+}$  cation was terminated with three ethanol molecules, to avoid unrealistic calculations, despite the fact that the evacuated solid contains no solvent molecules. This because, a solvent free  $\text{Co}_2\text{Cl}(\text{-COO})_3$  cluster would have a 3-coordinated  $\text{Co}^{2+}$  with three unsaturated sites, which is not realistic. Although the structure of the evacuated solid is not known, given the high microporosity found experimentally (68% of the calculated value based on the crystal structure), it is suggested that upon removal of the solvent molecules, neighboring layers in **1** are shifted to each other, in order for the coordinated  $\text{Cl}^-$  anion from one layer to interact with the coordinatively unsaturated  $\text{Co}^{2+}$  of the next layer, making a pseudo-tetrahedral  $\text{Co}^{2+}$  atom and stabilize in this way the structure, see Figure S18. This kind of stabilization (shift of layers and stabilization of neighboring inorganic building units) is known in 2D MOFs, as for example in MOF-2.<sup>8</sup> Note that in the solvated, as-made **1**, the  $\text{Cl}\cdots\text{Co}$  distance is small,  $\sim 6.3$  Å, and a relative shift of  $\sim 2$  Å for each layer in opposite direction, will create a new sort  $\text{Cl}\cdots\text{Co}$  contact of  $< 3$  Å ( $2.8$  Å is shown in figure S18), and

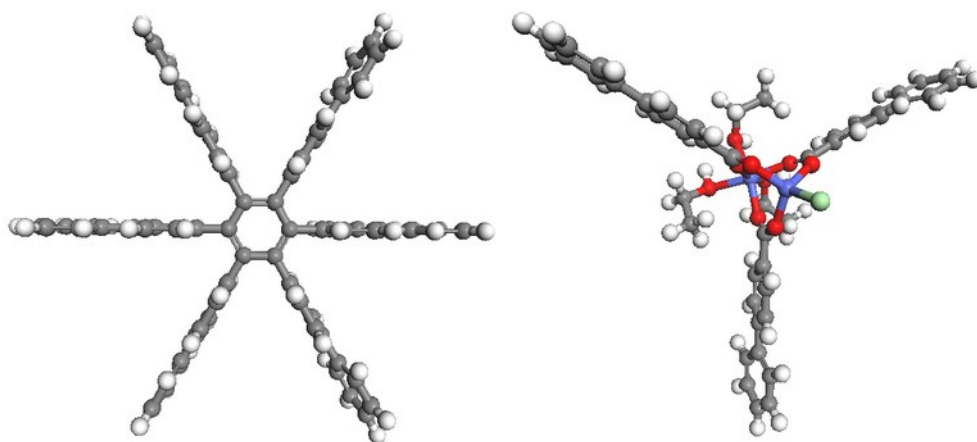

**Figure S17.** The two molecular models that were used to represent the binding sites of the MOF structure during calculations.

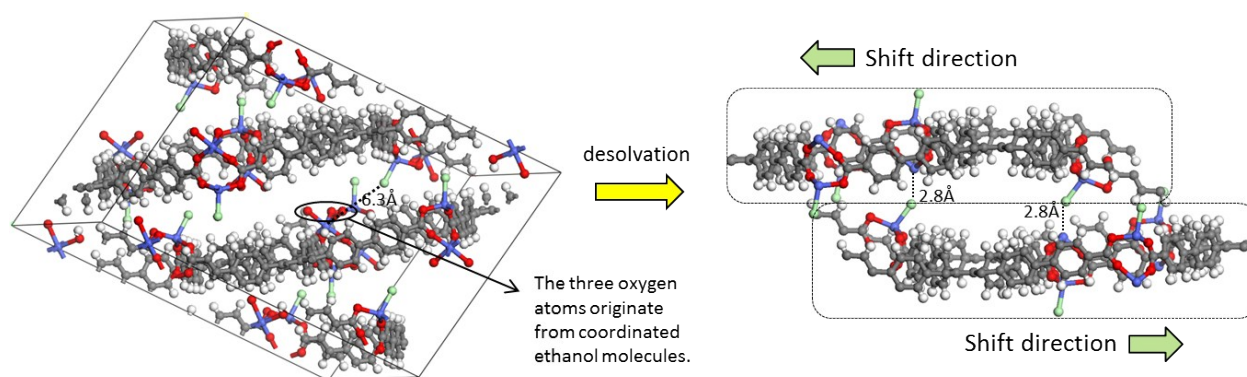

**Figure S18.** A proposed stabilization mechanism of desolvated **1**.

stabilize the solvent free  $\text{Co}^{2+}$  in a pseudo-tetrahedral coordination environment, see Figure S18. We decided not to perform the theoretical calculations in this structure, because the outcome could be sensitive to the relative shift of the layers (which is not known), making the results more complicated.

Both models were taken from the original crystal structure of **1** and the dangling bonds were saturated by adding hydrogen atoms. The positions of the atoms were kept fixed during calculations with the exception of the hydrogen and chlorine atoms, the ethanol molecules and the adsorbed guest molecules. The prediction of the geometry and the calculation of the interaction energies was based on the Density Functional Theory (DFT) method and the RI-PBE/def2-TZVP<sup>9</sup> computational model. Very tight convergence criteria were used for both the self-consistent field procedure ( $10^{-8}$  au) and the gradient ( $10^{-4}$  au). The corresponding auxiliary basis sets were used for the Resolution of Identity (RI) <sup>10</sup>approximation. The dispersion correction method of Grimme et al<sup>11</sup> with the proposed damping function of Becke-Johnson<sup>12</sup> was used to correct the total electronic energies due to the existence of dispersion forces. The calculation was performed with the Turbomole<sup>13</sup> quantum chemistry package.

The results that were obtained from the calculations show that  $\text{CO}_2$  interacts stronger with the pore surface of **1**, compared to  $\text{CH}_4$ . For the molecular model in the left of figure S17, two binding sites were identified. The first is on top of the central phenyl ring of the ligand where the second is the pocket which is formed between two adjacent biphenyl arms. The calculated interaction energy over the central phenyl ring was found to be 15.9

$\text{kJ}\cdot\text{mol}^{-1}$  and  $20.1 \text{ kJ}\cdot\text{mol}^{-1}$  for  $\text{CH}_4$  and  $\text{CO}_2$  respectively, where for the pocket site the corresponding calculated values were slightly higher at  $17.6 \text{ kJ}\cdot\text{mol}^{-1}$  and  $25.9 \text{ kJ}\cdot\text{mol}^{-1}$ . The distances of the carbon atoms of  $\text{CH}_4$  and  $\text{CO}_2$  from the center of the central phenyl ring are  $3.6\text{\AA}$  and  $3.7\text{\AA}$ . The corresponding distances from the two biphenyl arms forming the pocket site were measured to be  $3.4\text{\AA}$  and  $3.5\text{\AA}$  respectively. The optimized positions of the guest molecules can be seen in figure S19. For the case of the second molecular model that represents the inorganic building block in **1**, we found out that for both gases the strongest interaction site is the pocket formed between two adjacent biphenyl arms, as shown figure S20. The calculated interaction energies for this pocket were found to be  $17.6 \text{ kJ}\cdot\text{mol}^{-1}$  and  $26.3 \text{ kJ}\cdot\text{mol}^{-1}$  for  $\text{CH}_4$  and  $\text{CO}_2$  respectively.  $\text{CO}_2$  is oriented almost parallel to a virtual axis that passes through the Cobalt atoms and both C-O bonds and the corresponding O-C-O angle were slightly more distorted than in case of the interaction with the two sites in first molecular model. In the case of  $\text{CH}_4$ , the molecule is oriented with the two of its hydrogen atoms looking towards the Cobalt atoms and it is located at a distance of  $4\text{\AA}$  far from the Cobalt atom connected to the chlorine atom.

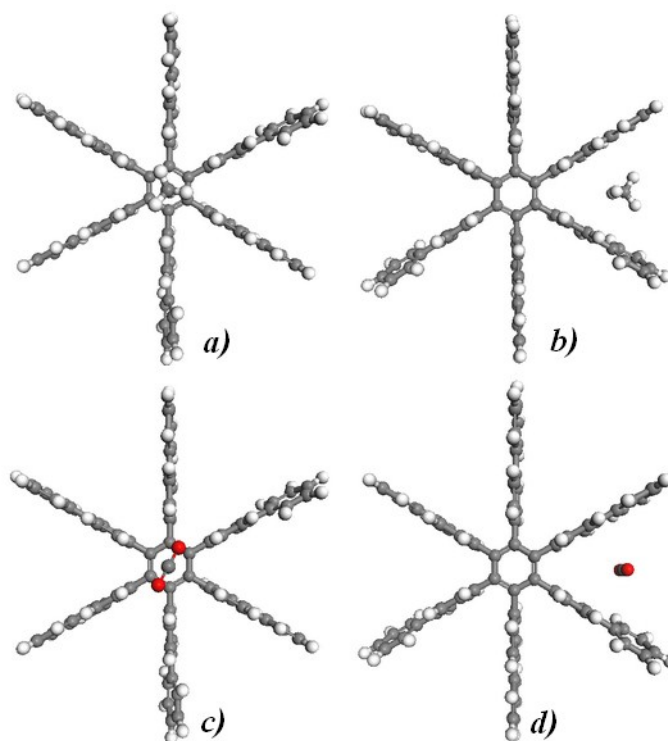

**Figure S19.** The optimized positions of the  $\text{CH}_4$  (a,b) and  $\text{CO}_2$  (c,d) molecules in the two binding sites found over the central phenyl ring and between two adjacent biphenyl arms.

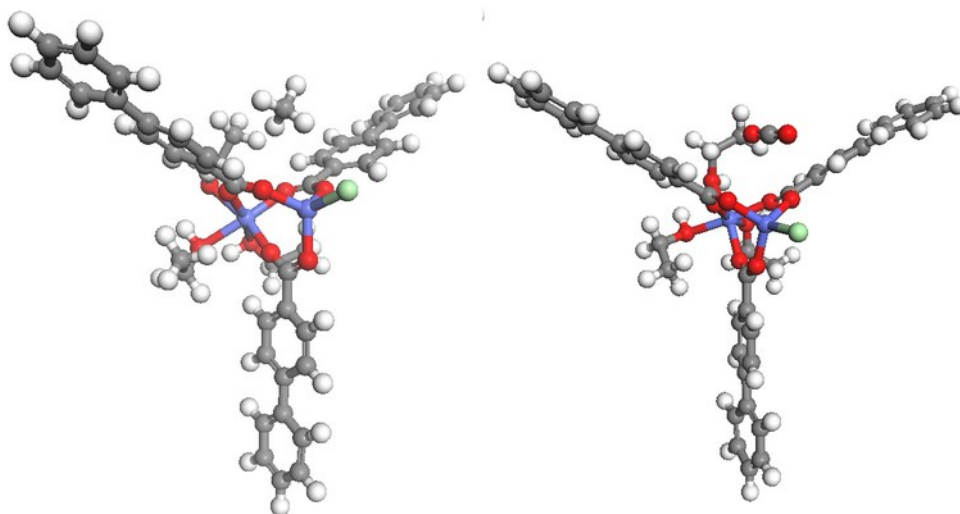

**Figure S20.** The optimized positions of the CH<sub>4</sub> (left) and CO<sub>2</sub> (right) molecules in the molecular model containing the inorganic building block.

## References

---

- <sup>1</sup> (a) Myers A. L., Prausnitz J. M., *AIChE J.*, **1965**, 11, 121-127. (b) Bae Y., Mulfort K. L., Frost H., Ryan P., Punnathanam S., Broadbelt, L. J., Hupp J. T., Snurr R. Q., *Langmuir*, **2008**, 24, 8592-8598. (c) Armatas G.S., Kanatzidis M.G., *Nat. Mater*, **2009**, 8, 217-222.
- <sup>2</sup> A. Kourtellaris, E. E. Moushi, I. Spanopoulos, C. Tampaxis, G. Charalambopoulou, T. A. Steriotis, G. S. Papaefstathiou, P. N. Trikalitis and A. J. Tasiopoulos, *Inorg. Chem. Front.*, **2016**, 3, 1527-1535.
- <sup>3</sup> J. M. Lin, C. T. He, Y. Liu, P. Q. Liao, D. D. Zhou, J. P. Zhang and X. M. Chen, *Angew. Chem. Int. Ed.*, **2016**, 55, 4674-4678.
- <sup>4</sup> Peng Y., Krungleviciute V., Eryazici I., Hupp J. T., Farha O. K., Yildirim T., *J. Am. Chem. Soc.*, **2013**, 135, 11887-11894.
- <sup>5</sup> Li B., Wen H., Wang H., Wu H., Tyagi M., Yildirim T., Zhou W., Chen B., *J. Am. Chem. Soc.*, **2014**, 136, 6207-6210.
- <sup>6</sup> Peng Y., Srinivas G., Wilmer C. E., Eryazici I., Snurr R.Q., Hupp J. T., Yildirim T., Farha O. K., *Chem. Commun.*, **2013**, 49, 2992-2994.
- <sup>7</sup> Gutov O. V., Bury W., Gomez-Gualdrón D. A., Krungleviciute V., Fairen-Jimenez D., Mondloch J. E., Sarjeant A. A., Al-Juaid S. S., Snurr R. Q., Hupp J. T., Yildirim T., Farha O. K., *Chem. Eur. J.*, **2014**, 20, 12389-12393.
- <sup>8</sup> H. Li, M. Eddaoudi, T. L. Groy, O. M. Yaghi, *J. Am. Chem. Soc.*, **1998**, 120, 8571-8572.
- <sup>9</sup> Weigend, F., Ahlrichs, R. *Phys. Chem. Chem. Phys.* 2005, 7, 3297.
- <sup>10</sup> Weigend F., Häser, M. *Theor. Chem. Acc.* 1997, 97, 331.
- <sup>11</sup> S. Grimme, J. Antony, S. Ehrlich, and S. Krieg, "A consistent and accurate ab initio parametrization of density functional dispersion correction (dft-d) for the 94 elements H-Pu", *J. Chem. Phys.* 2010, 132, 154104.
- <sup>12</sup> S. Grimme, S. Ehrlich, and L. Goerigk, "Effect of the damping function in dispersion corrected density functional theory", *J. Comp. Chem.* 2011, 32, 1456.
- <sup>13</sup> Ahlrichs, R., Bar, M., Haser, M., Horn, H., Kolmel, C. *Chem. Phys. Lett.* 1989, 162, 165-169.
